# Supplementary material for: Effects of food-based enrichment on enclosure use and behavioral patterns in captive mammalian predators: a case study from an Austrian wildlife park
Source: PeerJ. 2023 Oct 9;11:e16091. doi: 10.7717/peerj.16091 (PMC10569183; doi:10.7717/peerj.16091)
Supplement: Supplemental Information 1 [file peerj-11-16091-s001.docx]

**PeerJ**

**Supplementary Material**

Effects of food-based enrichment on enclosure use and behavioral patterns in captive mammalian predators: a case study from an Austrian wildlife park

Verena Puehringer-Sturmayr1,2, Monika Fiby3, Stephanie Bachmann1, Stefanie Filz1, Isabella Grassmann1, Theresa Hoi1, Claudia Janiczek1, *Didone Frigerio1,2

Authors’ affiliations and current addresses:

1Core Facility Konrad Lorenz Research Center for Behavior and Cognition, University of Vienna, Grünau im Almtal, Austria

2Department of Behavioral and Cognitive Biology, University of Vienna, Vienna, Austria

3Zoo Design and Consulting, Vienna, Austria

*Corresponding author: Didone Frigerio

Fischerau 13, Grünau im Almtal, 4645, Austria

Email address: [didone.frigerio@univie.ac.at](mailto:didone.frigerio@univie.ac.at)

Figure S1. Proportion of visibility in brown bears, separately for each combination of phase (pre-enrichment, during enrichment) and time of day interval (yellow: 0800 AM – 1100 AM, grey: 1100 AM – 0200 PM, blue: 0200 PM – 0600 PM). Bubbles indicate the number of observations in the respective combination.
